# Supplementary material for: Unterschiede zwischen Rettungsdiensteinsätzen mit und ohne Patiententransport
Source: Springer Nature journal article supplement (doi:10.1007/s00103-022-03590-3), 2022-09-16
Supplement: MOESM1 [file 23504048]

Onlinematerial zum Beitrag:

## **Unterschiede zwischen Rettungsdiensteinsätzen mit und ohne Patiententransport. Eine retrospektive Analyse der Leitstellendaten in einem Flächenstaat**

Florian Dax<sup>1,3</sup>, Heiko Trentzsch<sup>1</sup>, Marc Lazarovici<sup>1</sup>, Kathrin Hegenberg<sup>1</sup>, Katharina Kneißl<sup>1</sup>, Florian Hoffmann<sup>2</sup>, Stephan Prückner<sup>1</sup>

<sup>1</sup> Institut für Notfallmedizin und Medizinmanagement (INM), Klinikum der Universität München, LMU München, München, Deutschland

<sup>2</sup> Dr. von Haunersches Kinderspital, Kinderklinik und Kinderpoliklinik, Klinikum der Universität München, LMU München, München, Deutschland

<sup>3</sup> Bayerisches Rotes Kreuz (BRK), Landesgeschäftsstelle, München, Deutschland

### **Korrespondenzadresse:**

Priv.-Doz. Dr. Stephan Prückner  
Institut für Notfallmedizin und Medizinmanagement (INM)  
Klinikum der Universität München  
LMU München  
Schillerstr. 53  
80336 München  
Deutschland  
gs.inm@med.uni-muenchen.de

### **Inhalt:**

Tabelle 1: Definitionen der 18 Einsatzgründe mit 1.000 oder mehr Einsätzen im Jahr 2018

**Tabelle Z1: Definitionen der 18 Einsatzgründe mit 1.000 oder mehr Einsätzen im Jahr 2018.**

Quelle: Bayerisches Staatsministerium des Innern, für Sport und Integration (12.07.2016): Alarmierung im Rettungsdienst, Brand- und Katastrophenschutz in Bayern. Alarmierungsbekanntmachung (ABek)  
Fundstelle: AllMBl. 2016 S. 1575 [6]

Abkürzungen: ÄDB = Ärztlicher Bereitschaftsdienst, RD = Rettungsdienst, RTW = Rettungswagen

| <b>Einsatzgrund</b>                               | <b>Definition</b>                                                                                                                                                                                                                                        |
|---------------------------------------------------|----------------------------------------------------------------------------------------------------------------------------------------------------------------------------------------------------------------------------------------------------------|
| BMA<br>(Brandmeldeanlage)                         | <i>Automatisch ausgelöste Brand- oder Rauchwarnanlage mit Entsendung mindestens eines RTW</i>                                                                                                                                                            |
| Brand mit RD – mit und ohne vitale Bedrohung      | <i>Brandereignis mit Entsendung mindestens eines RTW</i>                                                                                                                                                                                                 |
| Hausnotruf aktiver Alarm                          | <i>Einsatzweitergabe durch die Hausnotrufzentrale bei aktiven Alarmen des Hausnotrufs (zum Beispiel Betätigung des Notrufknopfs für Senioren)</i>                                                                                                        |
| Technische Hilfeleistung (THL) mit Rettungsdienst | <i>Technische Hilfeleistung der Feuerwehr mit Entsendung mindestens eines RTW (zum Beispiel bei eingeschlossenen Personen)</i>                                                                                                                           |
| Kind - (bis 12 Jahre) erkrankt                    | <i>akute Symptomatik, die nicht an den Hausarzt oder ÄDB verwiesen werden kann, z. B. Ingestion von potenziell toxischen Substanzen ohne klinische Symptomatik</i>                                                                                       |
| Intoxikation                                      | <i>Intoxikation mit potenziell giftigen Substanzen ohne Hinweis auf eine vitale Störung von Herz, Kreislauf oder Bewusstsein</i>                                                                                                                         |
| Ärger                                             | <i>verletzt nach Schlägerei ohne akute Vitalbedrohung</i>                                                                                                                                                                                                |
| Psych                                             | <i>psychiatrischer Zustand, der den Verweis an den Hausarzt bzw. ÄDB nicht zulässt</i>                                                                                                                                                                   |
| Bewusstsein                                       | <i>neu aufgetretene, nicht zunehmende Bewusstseinsstörung unter Ausschluss einer vitalen Indikation, die nicht an den Hausarzt oder ÄDB verwiesen werden kann</i>                                                                                        |
| Kind (bis 12 Jahre) Trauma                        | <i>akute Verletzungen mit der Notwendigkeit einer zeitnahen Versorgung ohne Anhalt für vitale Gefährdung unter Berücksichtigung des Unfallmechanismus</i>                                                                                                |
| Trauma - Verkehrsunfall (VU) nur Rettungsdienst   | <i>akute Verletzungen mit der Notwendigkeit einer zeitnahen Versorgung ohne Anhalt für vitale Gefährdung unter Berücksichtigung des Unfallmechanismus</i>                                                                                                |
| Sonstiges Ereignis/Zustand                        | <i>Stoffwechselentgleisung ohne klinische Symptomatik, gastrointestinale oder gynäkologische Blutung, Nasenbluten, Entgleisungen der Körpertemperatur</i>                                                                                                |
| Herz/Kreislauf                                    | <i>neu aufgetretene, nicht zunehmende Herz- oder Kreislaufbeschwerden unter Ausschluss einer vitalen Indikation, die nicht an den Hausarzt oder ÄDB verwiesen werden können</i>                                                                          |
| Atmung                                            | <i>neu aufgetretene, nicht zunehmende Atembeschwerden unter Ausschluss einer vitalen Indikation, die nicht an den Hausarzt bzw. ÄDB verwiesen werden kann</i>                                                                                            |
| Neuro                                             | <i>neu aufgetretene, nicht zunehmende neurologische Ausfälle (z. B. Schlaganfallsymptome) ohne Bewusstseinsstörung, Zustand nach einmaligem Krampfanfall, sonstiger neurologischer Zustand, der einen Verweis an den Hausarzt bzw. ÄDB nicht zulässt</i> |
| Schmerzen                                         | <i>neu aufgetretene, nicht zunehmende Schmerzen, die den Verweis an den Hausarzt bzw. den ÄDB nicht zulassen</i>                                                                                                                                         |
| Trauma                                            | <i>akute Verletzungen mit der Notwendigkeit einer zeitnahen Versorgung ohne Anhalt für vitale Gefährdung unter Berücksichtigung des Unfallmechanismus, Stromunfall ohne Symptomatik</i>                                                                  |
| Geburt/Entbindung                                 | <i>Wehentätigkeit, Abgang Fruchtwasser, Geburt nicht unmittelbar bevorstehend</i>                                                                                                                                                                        |
